# Supplementary material for: Single channel properties of mitochondrial large conductance potassium channel formed by BK-VEDEC splice variant
Source: PubMed Central journal article supplement (PMC8149700; doi:10.1038/s41598-021-90465-3), 2021-05-25
Supplement: 41598_2021_90465_MOESM1_ESM.pdf [file 41598_2021_90465_MOESM1_ESM.pdf]

**Single channel properties of mitochondrial large conductance potassium channel formed by BK-VEDEC splice variant**

Shur Gałecka<sup>1\*</sup>, Bogusz Kulawiak<sup>1§\*</sup>, Piotr Bednarczyk<sup>2</sup>, Harpreet Singh<sup>3</sup>, Adam Szewczyk<sup>1</sup>

<sup>1</sup>Laboratory of Intracellular Ion Channels, Nencki Institute of Experimental Biology, Polish Academy of Sciences, Pasteura 3, 02-093 Warsaw, Poland;

<sup>2</sup>Department of Physics and Biophysics, Institute of Biology, Warsaw University of Life Sciences-SGGW, Nowoursynowska 166, 02-787 Warsaw, Poland;

<sup>3</sup>Department of Physiology and Cell Biology, The Ohio State University, Columbus, OH, 43210, USA.

\*both authors contributed equally

§To whom correspondence should be addressed. Bogusz Kulawiak: Laboratory of Intracellular Ion Channels, Nencki Institute of Experimental Biology, Polish Academy of Sciences, 3 Pasteur St., 02-093 Warsaw, Poland; [b.kulawiak@nencki.edu.pl](mailto:b.kulawiak@nencki.edu.pl); Tel. (48) 22 58 92 343

Figure S1

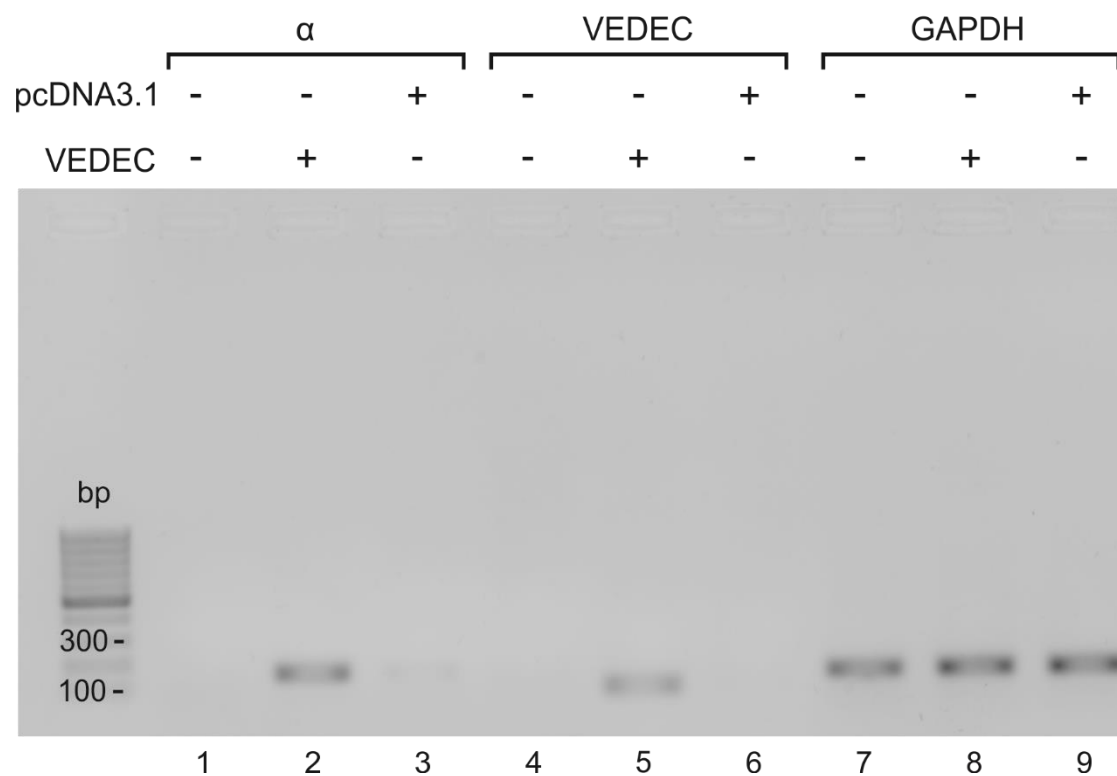

**Figure S1. Analysis of selected gene expression using qualitative PCR in wild-type and VEDEC transiently transfected HEK293T cells.** Full length of the agarose gel presented in the Figure 6A.

Figure S2

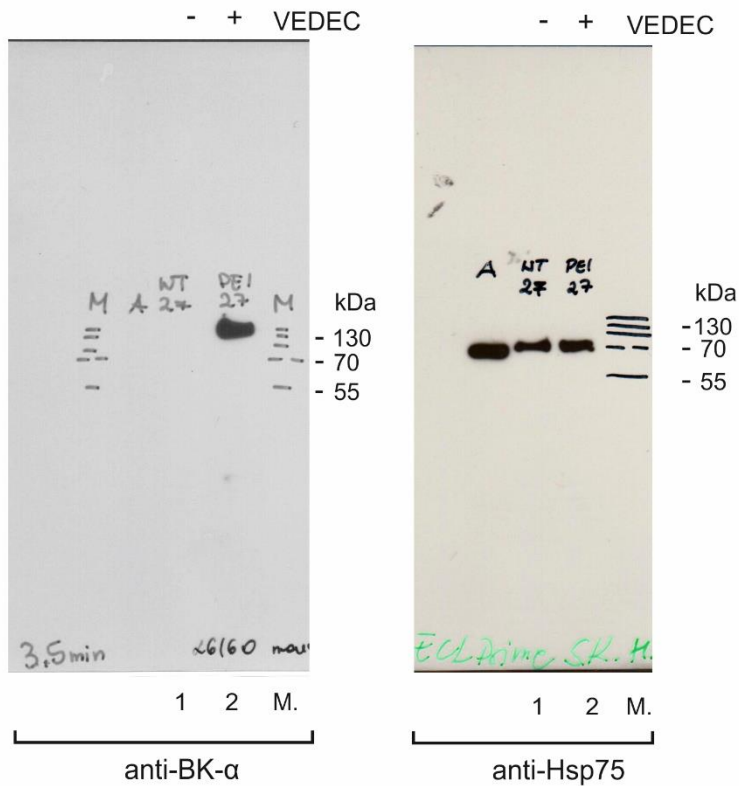

**Figure S2. Western blot analysis of the BK<sub>Ca</sub> pore-forming subunit in the mitochondrial fraction of wild-type and VEDEC transiently transfected HEK293T cells.** Full length of the PVDF membranes presented in the Figure 6C. The membrane was cut below 55 kDa marker and then was initially probed with an anti-BK $\alpha$  antibody (NeuroMabs, clone L6/60, diluted 1:200). Afterwards it was reprobed with an anti-mHSP75 antibody (Abcam, 1:1000). The blots were developed using a secondary anti-rabbit or anti-mouse antibody (both GE Healthcare) coupled to horseradish peroxidase in conjunction with an enhanced chemiluminescence solution (GE Healthcare).
